# Supplementary material
Source: Springer Nature journal article supplement (https://www.springermedizin.de/resource/supplementary/40478_2013_37_MOESM10_ESM.pdf/25658000)

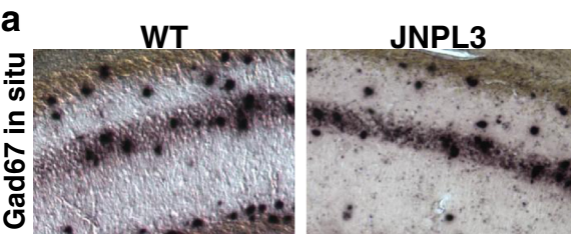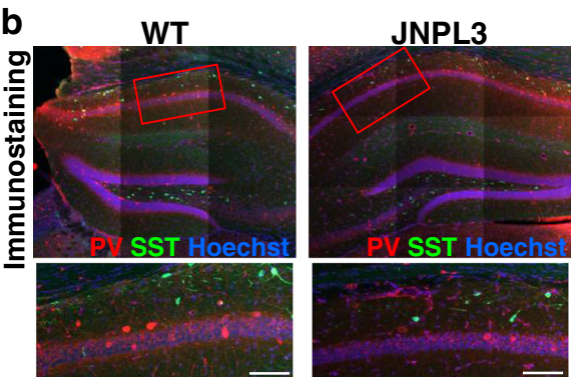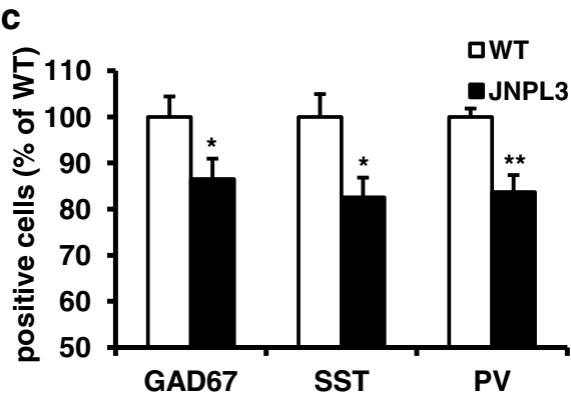

Supplement: MOESM10 [file 25658000]
